Abstract #: 4138

**Suicidal Behavior and Mental Health in the Sami Context.**

**S. Kvernmo, MD**

University of Tromsø The Arctic University of Norway, Tromsø, Norway

Abstract not supplied
